# Supplementary material
Source: PubMed Central journal article supplement (PMC9124198)
Supplement: 41598_2022_11787_MOESM1_ESM.pdf [file 41598_2022_11787_MOESM1_ESM.pdf]

Heterogeneous SARS-CoV-2 humoral response after COVID-19 vaccination and/or infection in the general population.

Fabrice Carrat<sup>1</sup>✉, Paola Mariela Saba Villarroel<sup>2</sup>, Nathanael Lapidus<sup>1</sup>, Toscane Fourié<sup>2</sup>, H  l  ne Blanch  <sup>3</sup>, C  line Dorival<sup>4</sup>, Jerome Nicol<sup>4</sup>, Jean-Fran  ois Deleuze<sup>3</sup>, Olivier Robineau<sup>4</sup>, SAPRIS-SERO study group\*, Mathilde Touvier<sup>5</sup>, Gianluca Severi<sup>6,7</sup>, Marie Zins<sup>8,9</sup>, Xavier de Lamballerie<sup>2</sup>.

## **Supplementary Information**

## Supplementary Tables.

**Table S1.** Characteristics of participants

| Covariates                                     | n (%) or median (Q1-Q3) |
|------------------------------------------------|-------------------------|
| Source cohorte                                 |                         |
| Constances                                     | 6082 (44)               |
| E3NE4N                                         | 3768 (27)               |
| Nutrinet-Santé                                 | 4121 (30)               |
| Age - yrs                                      | 58 (45-71)              |
| Age group (years)                              |                         |
| [20-30[                                        | 227 (1.6)               |
| [30-40[                                        | 1673 (12)               |
| [40-50[                                        | 2960 (21)               |
| [50-60[                                        | 2455 (18)               |
| [60-70[                                        | 2693 (19)               |
| [70-80[                                        | 3504 (25)               |
| 80+                                            | 459 (3.3)               |
| Gender                                         |                         |
| Male                                           | 4749 (34)               |
| Female                                         | 9222 (66)               |
| Living Area                                    |                         |
| Rural                                          | 2902 (21)               |
| <20,000 inhab.                                 | 2171 (16)               |
| 20-000-100,000 inhab.                          | 2282 (17)               |
| >100,000 inhab.                                | 6327 (46)               |
| Missing                                        | 289                     |
| Household size and composition                 |                         |
| Nb adults (inc. participant)                   |                         |
| 1                                              | 2411 (17)               |
| 2                                              | 6409 (46)               |
| 3+                                             | 5150 (37)               |
| Nb children (<18yrs)                           |                         |
| 0                                              | 10212 (73)              |
| 1+                                             | 3758 (27)               |
| Missing                                        | 1                       |
| Socio professional category                    |                         |
| Farmer                                         | 28 (0.2)                |
| Craftsmen, traders and business owners         | 313 (2.3)               |
| Executives and higher intellectual professions | 6666 (49)               |
| Intermediate occupations                       | 3972 (29)               |
| Employees                                      | 2000 (15)               |
| Workers                                        | 246 (1.8)               |
| Never worked                                   | 254 (1.9)               |
| Other                                          | 145 (1.1)               |
| Missing                                        | 347                     |
| Smoking status                                 |                         |
| Non smoker                                     | 6866 (50)               |
| Active smoker                                  | 1384 (10)               |
| Ex-smoker                                      | 5452 (40)               |
| Missing                                        | 269                     |
| Alcohol use (in g/dy)                          |                         |
| <5                                             | 5642 (43)               |
| [5,10[                                         | 2512 (19)               |
| [10,20[                                        | 2855 (22)               |
| [20,30[                                        | 1208 (9.2)              |
| ≥30                                            | 901 (6.9)               |
| Missing                                        | 853                     |
| BMI (kg/m <sup>2</sup> )                       |                         |
| <25                                            | 8609 (62)               |
| [25; 30[ (overweight)                          | 3732 (27)               |
| >=30 (obese)                                   | 1241 (8.9)              |
| Missing                                        | 389                     |

**Table S1.** Characteristics of participants (continued)

| Covariates                                                                         | n (%) or median (Q1-Q3) |
|------------------------------------------------------------------------------------|-------------------------|
| Chronic diseases                                                                   |                         |
| No                                                                                 | 9307 (67)               |
| Yes (at least one)                                                                 | 4552 (33)               |
| Don't know                                                                         | 80 (0.6)                |
| Missing                                                                            | 32                      |
| Specific chronic diseases (a participant may suffer from several chronic diseases) |                         |
| Asthma, COPD, other respiratory diseases                                           | 1781 (13)               |
| Diabetes                                                                           | 736 (5.3)               |
| Hypertension                                                                       | 1500 (11)               |
| Other cardiovascular diseases                                                      | 439 (3.2)               |
| Cancer                                                                             | 685 (4.9)               |
| Anxiety, depression                                                                | 354 (2.5)               |
| Other                                                                              | 2676 (19)               |
| Missing                                                                            | 32                      |
| Month baseline sampling (2020)                                                     |                         |
| May                                                                                | 2864 (21)               |
| June                                                                               | 182 (1.3)               |
| July                                                                               | 7662 (55)               |
| August                                                                             | 2462 (18)               |
| September                                                                          | 790 (5.7)               |
| October                                                                            | 11 (0.1)                |
| Month follow-up sampling (2021)                                                    |                         |
| May                                                                                | 11 (0.1)                |
| June                                                                               | 11711 (84)              |
| July                                                                               | 1836 (13)               |
| August                                                                             | 346 (2.5)               |
| September                                                                          | 49 (0.4)                |
| October                                                                            | 18 (0.1)                |
| Infected during the 1st wave                                                       |                         |
| No                                                                                 | 11,058 (79)             |
| Yes                                                                                | 2913 (21)               |

**Table S2.** Factors associated with an anti-spike IgG titer  $\geq 264$  BAU/mL at the follow-up sample

|                                                                                                                                                        | Anti-spike IgG<br>$\geq 264$ BAU/mL<br>n (%)                                                  | P-Value |
|--------------------------------------------------------------------------------------------------------------------------------------------------------|-----------------------------------------------------------------------------------------------|---------|
| Follow-up profiles<br>NoVac, NoDiag<br>1Vac, NoDiag<br>2or3Vac, NoDiag<br>NoVac, 1Diag<br>NoVac, 2Diag<br>1or2Vac->Diag<br>Diag->1Vac<br>Diag->2or3Vac | 62 (3.2)<br>1347 (39)<br>3974 (78)<br>144 (13)<br>12 (15)<br>24 (65)<br>1198 (75)<br>628 (93) | <0.0001 |
| Age group (years)<br>[20-30[<br>[30-40[<br>[40-50[<br>[50-60[<br>[60-70[<br>[70-80[<br>80+                                                             | 104 (46)<br>626 (37)<br>1258 (43)<br>1203 (49)<br>1494 (55)<br>2433 (69)<br>271 (59)          | <0.0001 |
| Gender<br>Male<br>Female                                                                                                                               | 2362 (50)<br>5027 (55)                                                                        | <0.0001 |
| BMI (kg/m <sup>2</sup> )<br><25<br>[25; 30[ (overweight)<br>>=30 (obese)<br>Missing                                                                    | 4487 (52)<br>2045 (55)<br>652 (53)<br>389                                                     | 0.0229  |
| Smoking status before lockdown<br>Non smoker<br>Active smoker<br>Ex-smoker<br>Missing                                                                  | 3635 (53)<br>655 (47)<br>2969 (55)<br>269                                                     | <0.0001 |
| Alcohol use (in g/dy)<br><5<br>[5,10[<br>[10,20[<br>[20,30[<br>$\geq 30$<br>Missing                                                                    | 2975 (53)<br>1312 (52)<br>1552 (54)<br>633 (52)<br>460 (51)<br>853                            | 0.3670  |
| Chronic diseases<br>Yes<br>No<br>Don't know<br>Missing                                                                                                 | 2613 (57)<br>4714 (51)<br>41 (51)<br>32                                                       | <0.0001 |
| Infected during the 1st wave<br>No<br>Yes                                                                                                              | 5728 (52)<br>1661 (57)                                                                        | <0.0001 |
| Time between baseline and follow-up serology (days)<br>Q1 (233-317(<br>Q2 (317-330(<br>Q3 (330-358(<br>Q4 (358-514(                                    | 1651 (49)<br>1696 (49)<br>2204 (61)<br>1838 (53)                                              | <0.0001 |

**Supplementary Figures.**

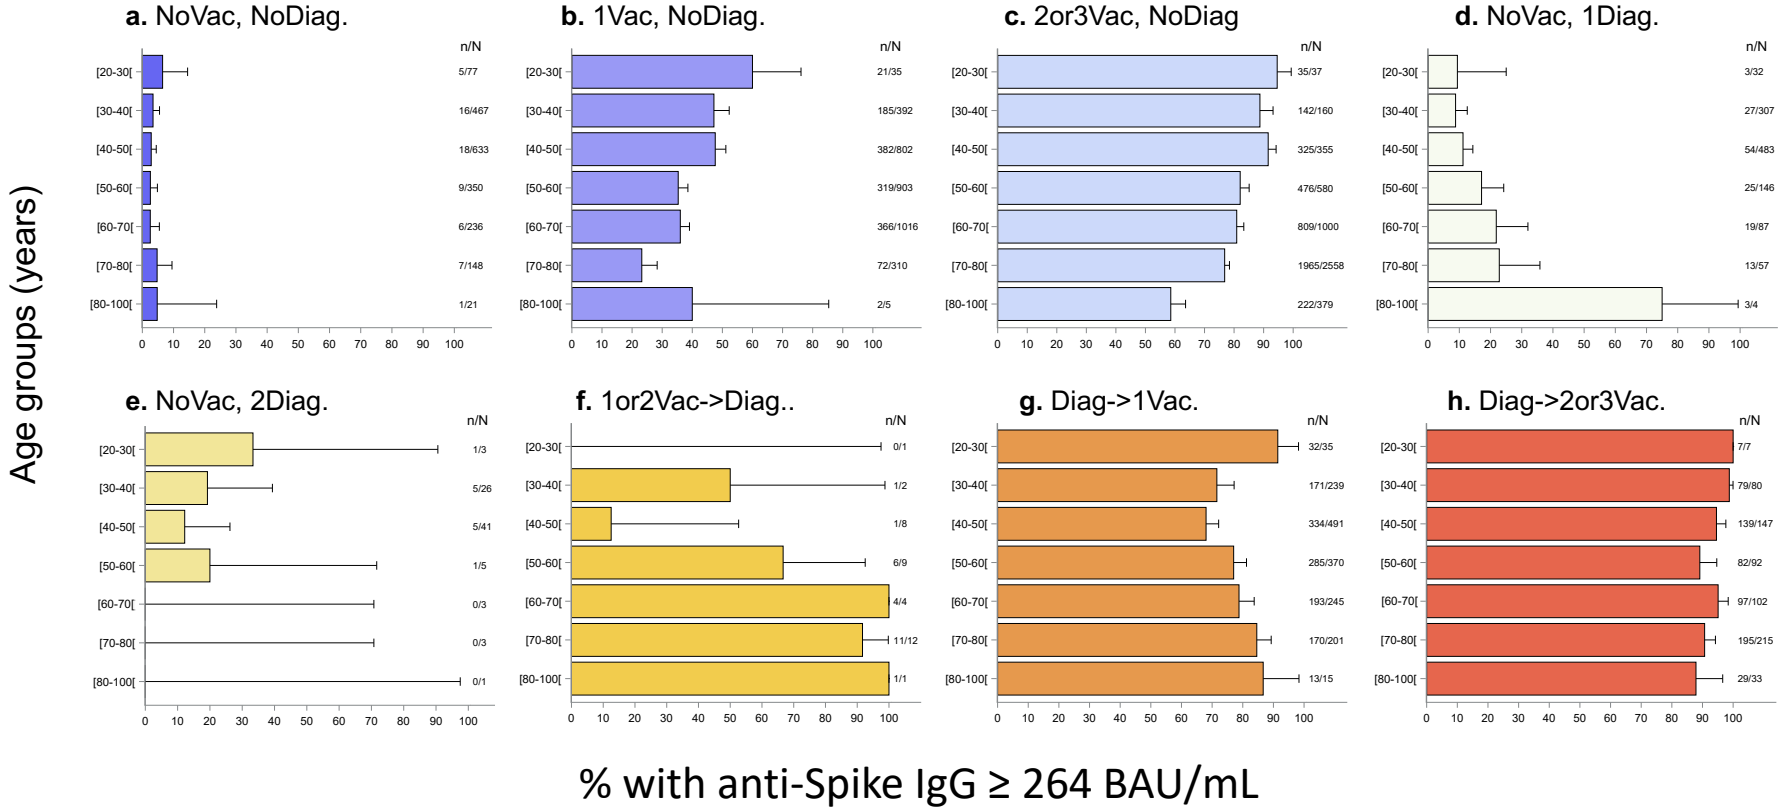

**Figure S1.** Proportion of participants with anti-spike IgG ≥ 264 BAU/mL according to age groups by follow-up profiles (a. to h.). Error bars represent upper-limit of the 95% Confidence Intervals calculated using an exact method.

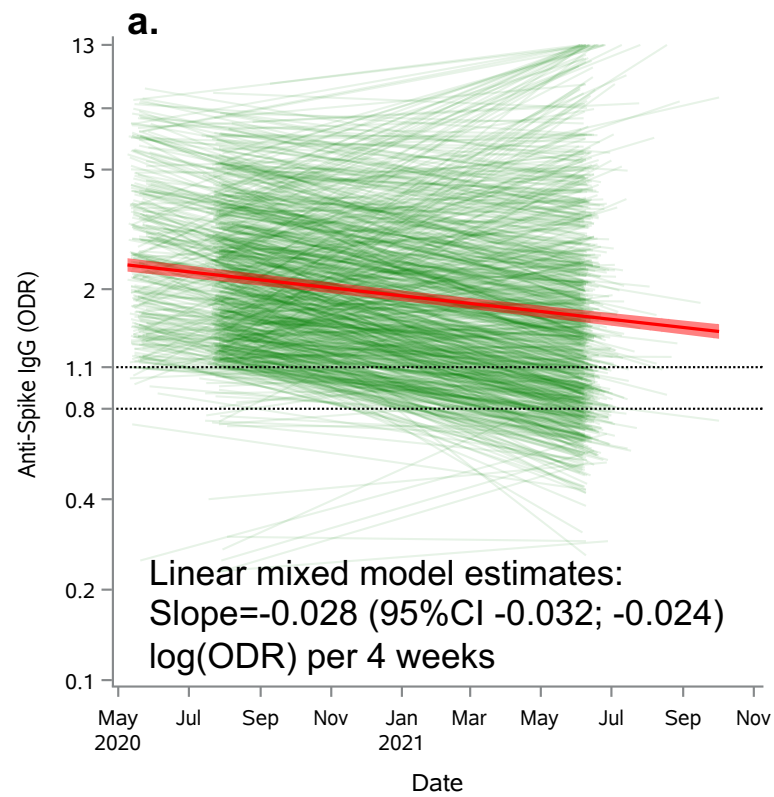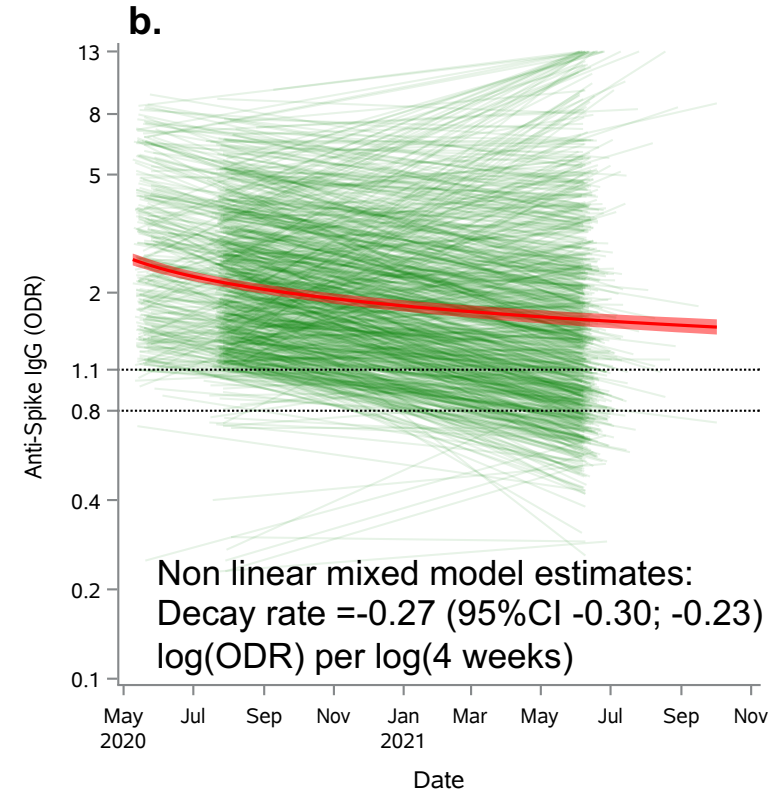

**Figure S2.** Spaghetti plot of anti-spike IgG (ODR) at baseline and follow-up in 834 participants infected during the first wave of the pandemic who remained unvaccinated at the time of the follow-up serology. **a.** Estimates from a linear mixed model with random by subject intercept. **b.** Estimates from a non-linear mixed power-law model with random by subject coefficients.

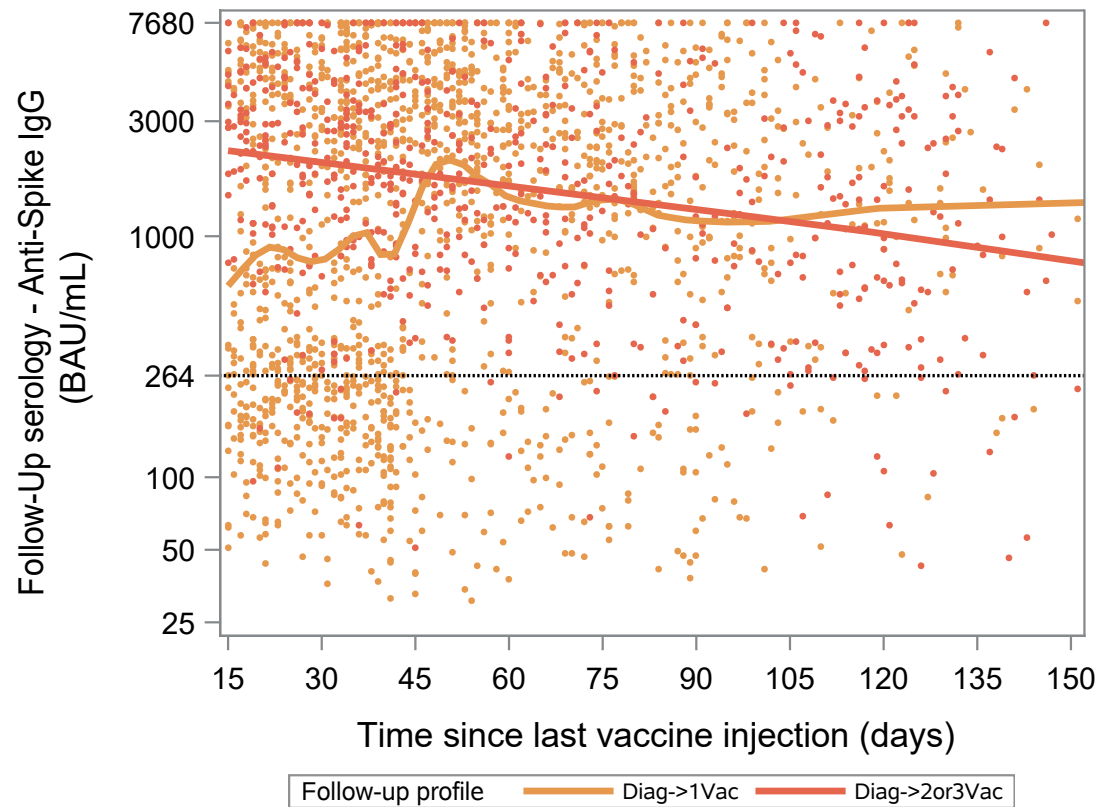

**Figure S3.** Scatter Plot of anti-spike IgG (BAU/mL) according to time since the first (Diag->1Vac) or second (Diag->2or3Vac) vaccine dose in participants with prior infection or diagnosis, and locally weighted polynomial smoothing (LOESS) trend estimates. The dashed line at 264 BAU/mL was estimated to be associated with 80% vaccine efficacy against symptomatic infection with the Alpha (B.1.1.7) variant<sup>9</sup>. Fourteen samples not shown, 5 participants with 3 vaccine doses not shown.

## **Supplementary Note S1.**

### **The SAPRIS-SERO study group (full list)**

Fabrice Carrat, Pierre-Yves Ancel, Marie-Aline Charles, Gianluca Severi, Mathilde Touvier, Marie Zins (SAPRIS-SERO investigators).

Nathalie Bajos, Fabrice Carrat, Pierre-Yves Ancel, Marie-Aline Charles, Florence Jusot, Claude Martin, Laurence Meyer, Ariane Pailhé, Alexandra Rouquette, Gianluca Severi, Alexis Spire, Mathilde Touvier, Marie Zins (SAPRIS questionnaires). Sofiane Kab, Adeline Renuy, Stephane Le-Got, Celine Ribet, Emmanuel Wiernik, Marcel Goldberg, Marie Zins (Constances cohort).

Fanny Artaud, Pascale Gerbouin-Rérolle, Mélody Enguix, Camille Laplanche, Roselyn Gomes-Rima, Lyan Hoang, Emmanuelle Correia, Alpha Amadou Barry, Nadège Senina, Gianluca Severi (E3N-E4N cohort)

Julien Allegre, Fabien Szabo de Edelenyi, Nathalie Druesne-Pecollo, Younes Esseddik, Serge Hercberg, Mélanie Deschasaux, Mathilde Touvier (NutriNet-Santé cohort)

Marie-Aline Charles, Pierre-Yves Ancel, Valérie Benhammou, Anass Ritmi, Laetitia Marchand, Cecile Zaros, Elodie Lordmi, Adriana Candea, Sophie de Visme, Thierry Simeon, Xavier Thierry, Bertrand Geay, Marie-Noelle Dufourg, Karen Milcent (Epipage2 and Elfe child cohorts)

Delphine Rahib, Nathalie Lydie (Santé Publique France)

Clovis Lusivika-Nzinga, Gregory Pannetier, Nathanael Lapidus, Isabelle Goderel, Céline Dorival, Jérôme Nicol, Olivier Robineau, Fabrice Carrat (IPLESP – methodology and coordinating data center)

Cindy Lai, Liza Belhadji, Hélène Esperou, Sandrine Couffin-Cadiergues (Inserm) Jean-Marie Gagliolo (Institut de Santé Publique)

Hélène Blanché, Jean-Marc Sébaoun, Jean-Christophe Beaudoin, Laetitia Gressin, Valérie Morel, Ouissam Ouili, Jean-François Deleuze (CEPH-Biobank)

Laetitia Ninove, Stéphane Priet, Paola Mariela Saba Villarroel, Toscane Fourié, Souand Mohamed Ali, Abdenour Amroun, Morgan Seston, Nazli Ayhan, Boris Pastorino, Xavier de Lamballerie (Unité des Virus Emergents)
